# Supplementary material for: Hierarchical architecture of the metallic VTe2/Ti3C2Tx MXene heterostructure for supercapacitor applications
Source: Royal Society of Chemistry journal article supplement (doi:10.1039/d2ta05904e), 2022-01-01
Supplement: d2ta05904e1.pdf [file d2ta05904e1.pdf]

## Supporting Information

### **Hierarchical Architecture of Metallic VTe<sub>2</sub>/Ti<sub>3</sub>C<sub>2</sub>T<sub>x</sub> MXene Heterostructure for Supercapacitor Applications**

Sree Raj K A,<sup>1</sup> Narad Barman<sup>2</sup>, Sithara Radhakrishnan<sup>1</sup>, Ranjit Thapa<sup>2</sup>, and Chandra Sekhar Rout<sup>\*,1</sup>

<sup>1</sup> Centre for Nano and Material Science, Jain University, Jain global campus, Jakkasandra, Ramanagaram, Bangalore - 562112, India.

<sup>2</sup> Department of Physics, SRM University – AP, Amaravati 522 240, Andhra Pradesh, India.

\*Corresponding author: csrout@gmail.com, r.chandrasekhar@jainuniversity.ac.in (CSR);

#### **Electrochemical Calculations**

Three electrode configuration-

*Specific capacitance (C<sub>sp</sub>) from cyclic voltammetry;*

$$C_{sp} = \frac{\text{Area of CV curve}}{2 * m * \nu * \Delta V} \quad (\text{S1})$$

Where, m is the mass of active material,  $\nu$  is the scan rate and  $\Delta V$  is the potential window.

*Specific capacitance (C<sub>sp</sub>) from galvanostatic charge discharge;*

$$C_{sp} = \frac{i * \Delta t}{m * \Delta V} \quad (\text{S2})$$

Where, i is the applied current,  $\Delta t$  is the discharge time.

*Charge balance equation;<sup>1</sup>*

$$\frac{m_+}{m_-} = \frac{C_- * \Delta V_-}{C_+ * \Delta V_+} \quad (\text{S3})$$

*Specific capacitance (C<sub>sp</sub>) of ASC from galvanostatic charge discharge;*

$$C_{sp} = \frac{i * \Delta t}{m * \Delta V} \quad (\text{S4})$$

*Energy density of ASC;*

$$E_D = \frac{1}{2}CV^2 \quad (S5)$$

Where, C is specific capacitance of ASC, V is the working window of ASC.

*Power density of ASC;*

$$P_D = \frac{E_D}{\Delta t} \quad (S6)$$

### Supporting Figures

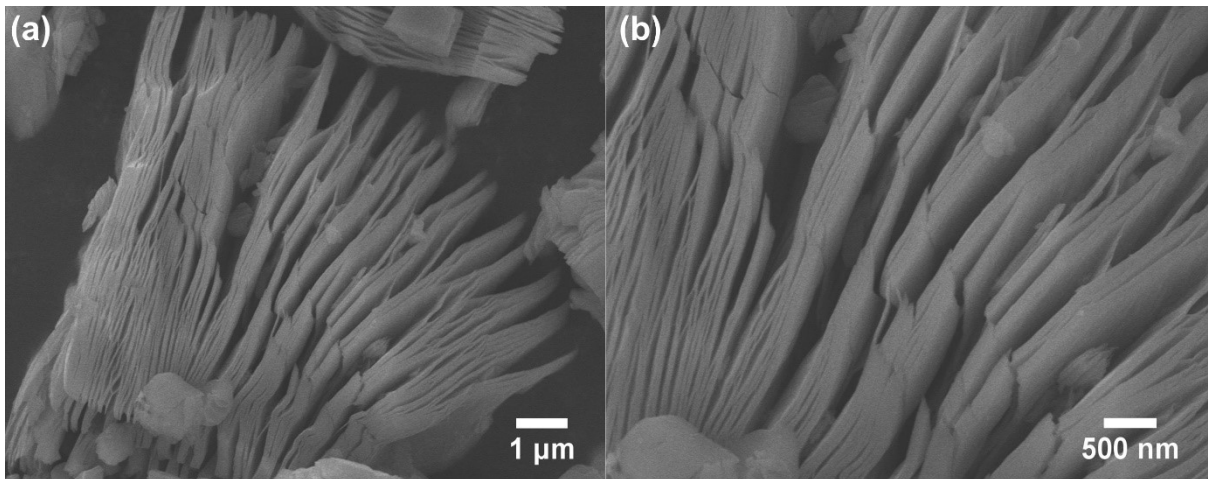

**Figure S1:** Low (a) and high (b) resolution FESEM images of etched MXene showing the accordion like morphology.

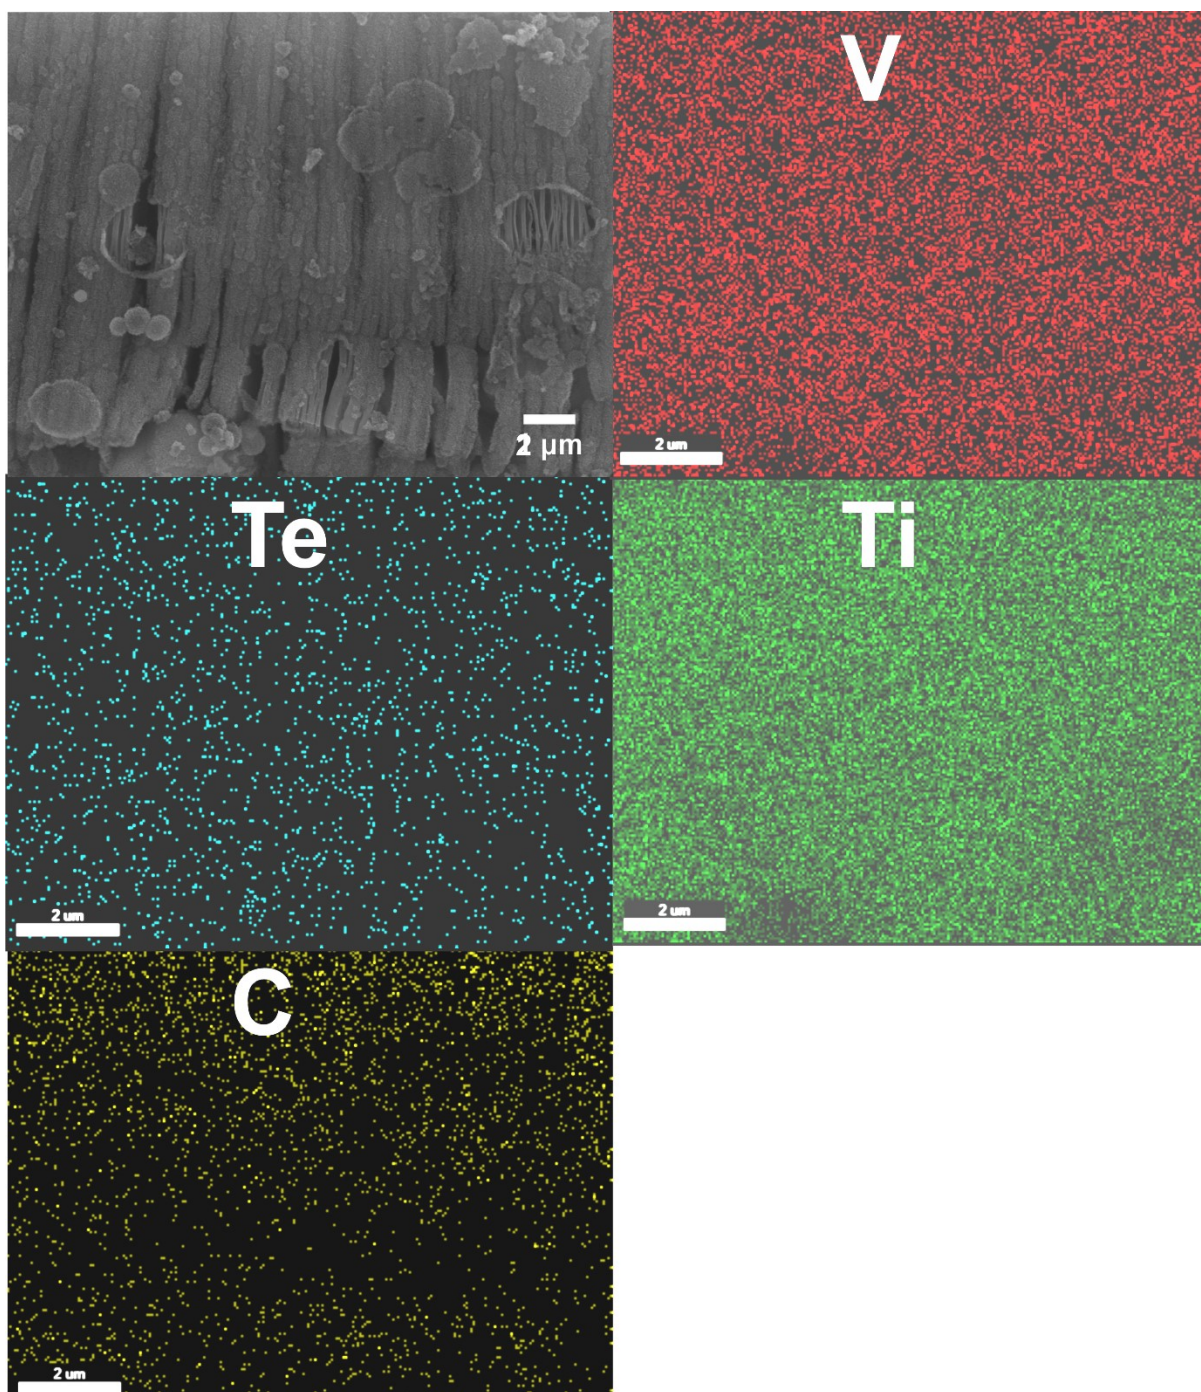

**Figure S2:** EDS element mapping of VTX80 sample showing the uniform distribution of V, Te, Ti, and C.



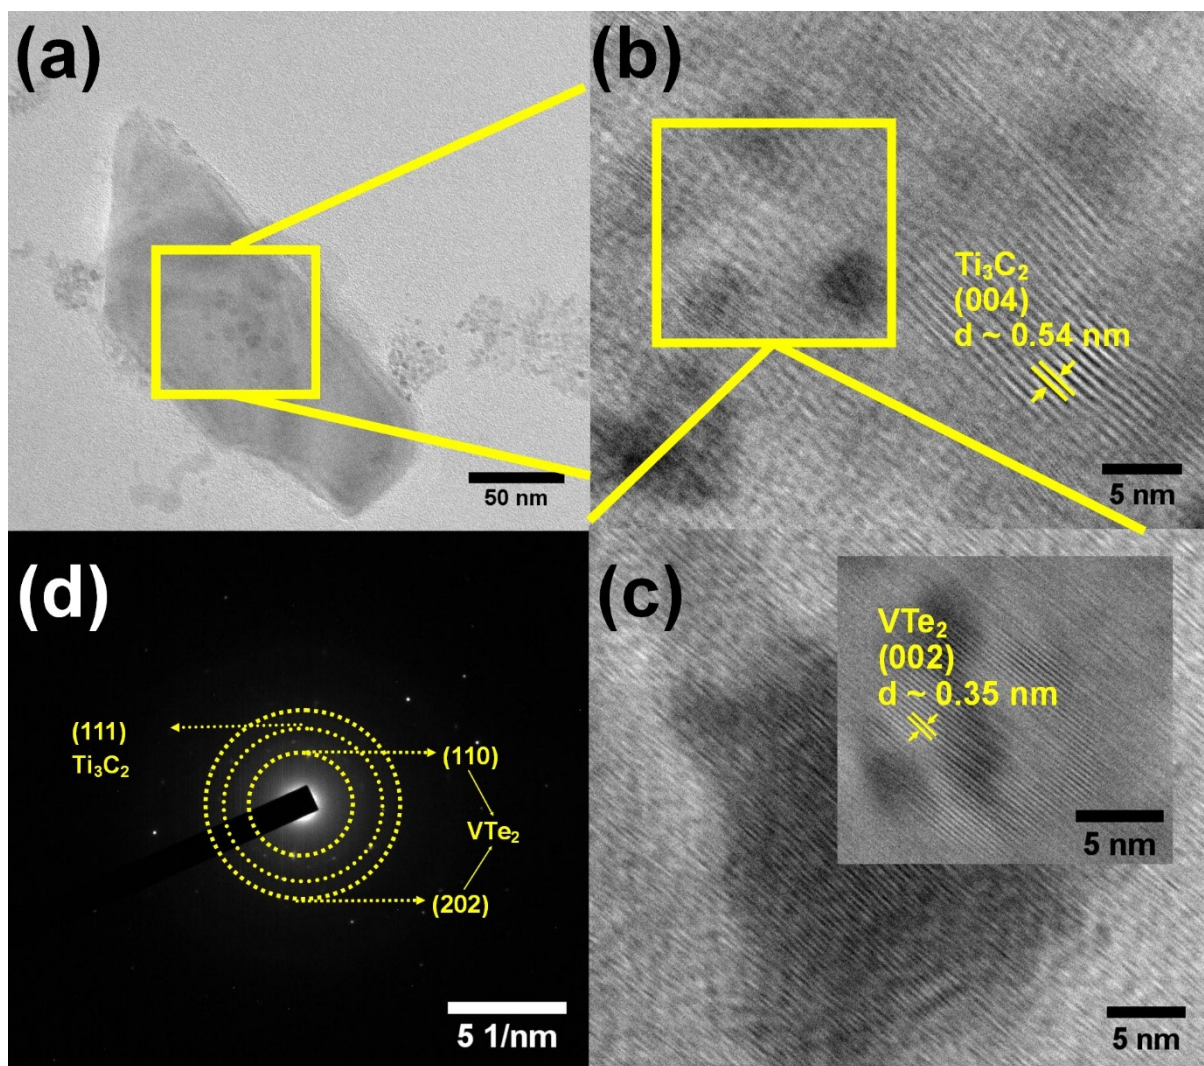

**Figure S3:** (a) TEM image of VTX 80, (b, c) HRTEM images of VTX 80 showing lattice fringes of (004) plane of  $\text{Ti}_3\text{C}_2$  MXene and (002) plane of  $\text{VTe}_2$  and (d) corresponding SAED pattern.

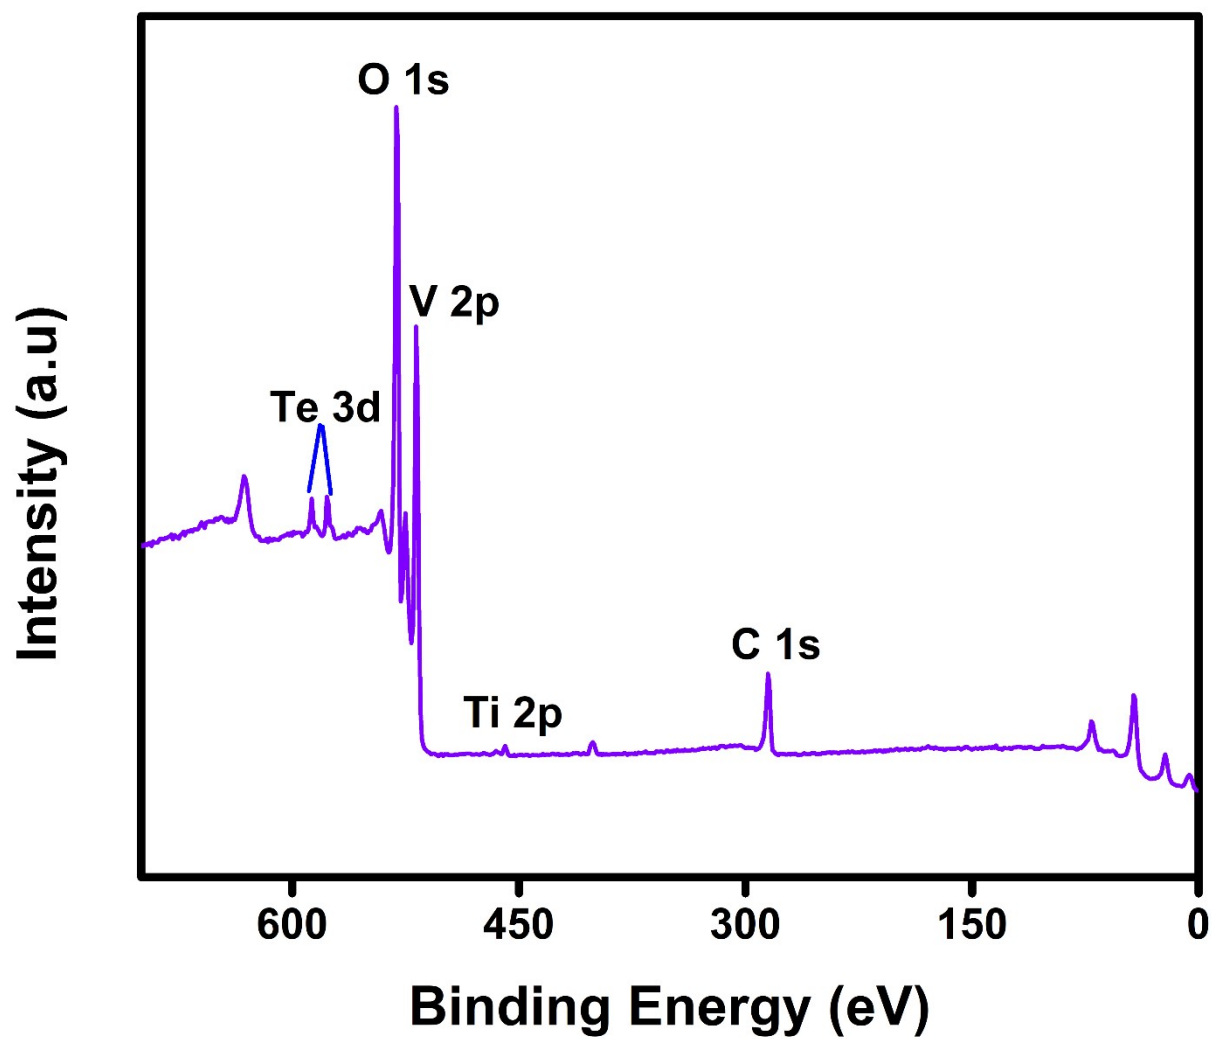

**Figure S4:** XPS survey spectrum of VTX80 showing the presence of V 2p, Te 3d, C 1s and Ti 2p species.

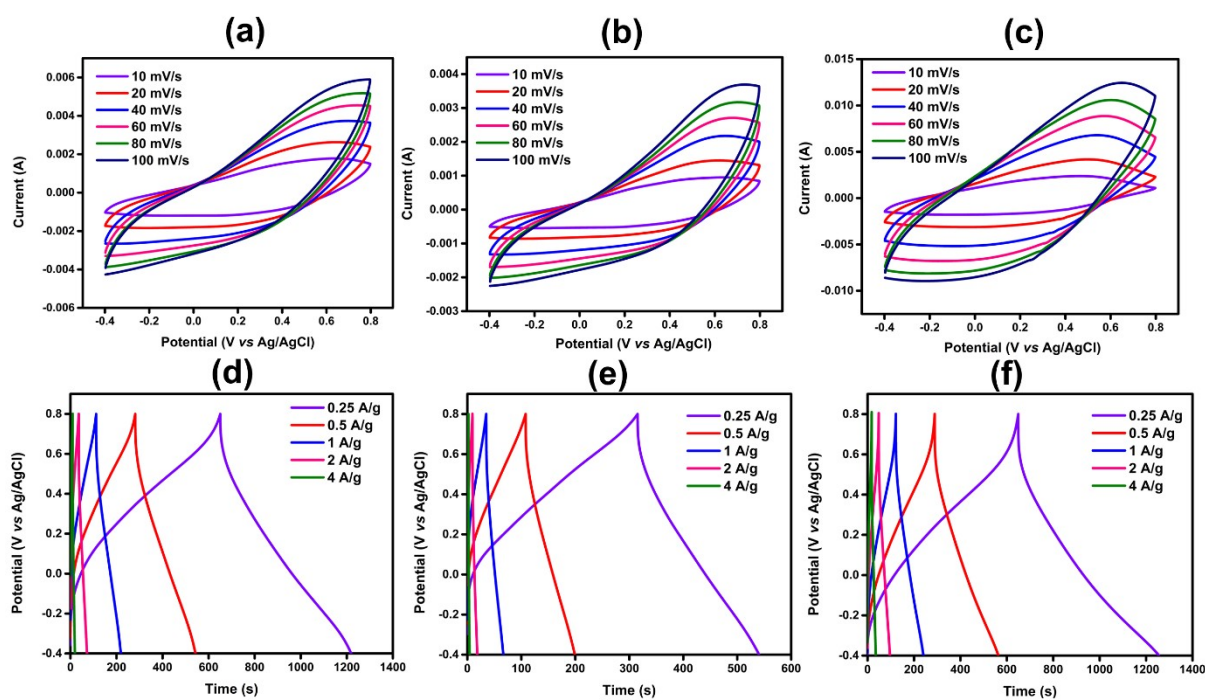

**Figure S5:** Cyclic voltammograms of (a) VTe<sub>2</sub>, (b) VTX40, (c) VTX120 in varying scan rates, GCD curves of (d) VTe<sub>2</sub>, (e) VTX40 and (f) VTX120 in different specific currents ranging from 0.25 to 4 A/g.

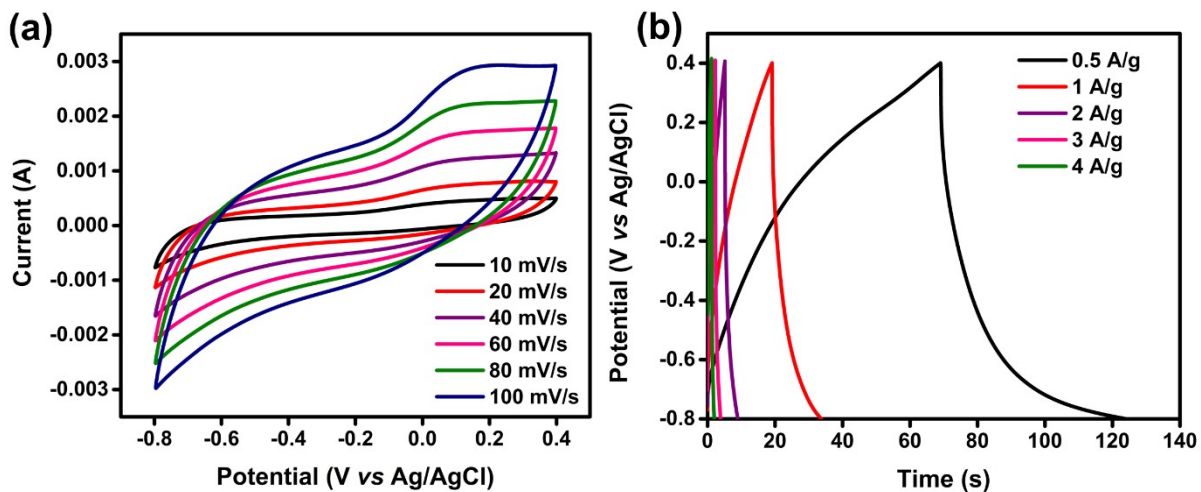

**Figure S6:** (a) Cyclic voltammogram and (b) GCD profile of MXene.

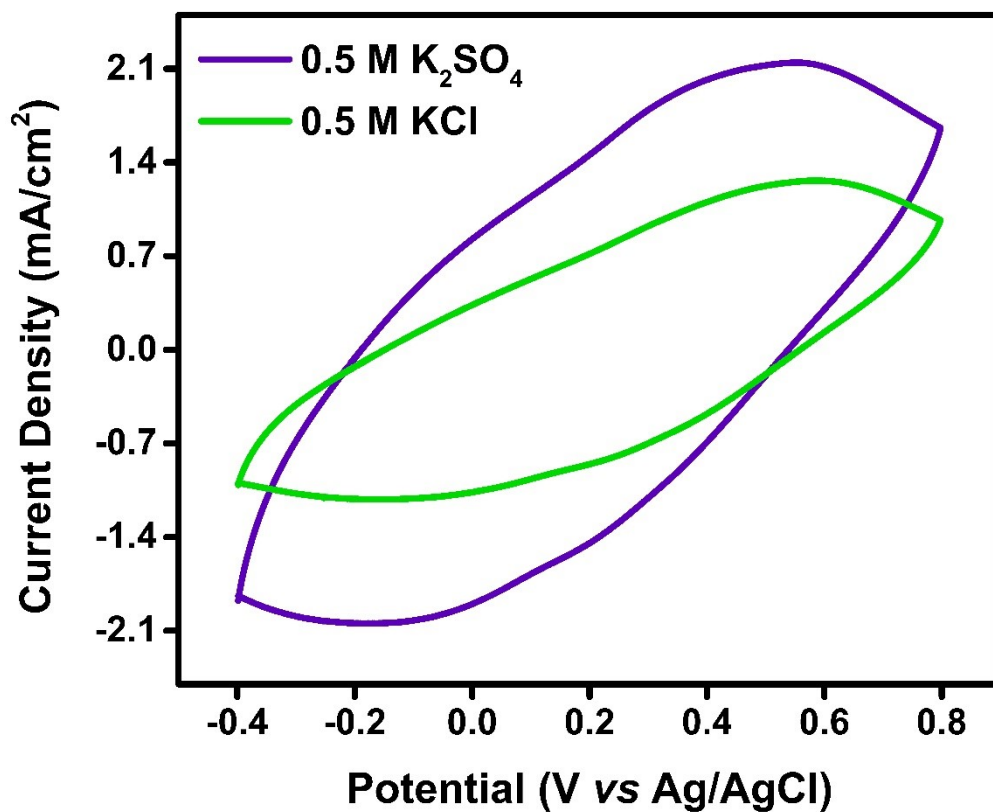

**Figure S7:** Comparison of the CV curves of VTX80 electrode in 0.5M  $K_2SO_4$  and 0.5M  $KCl$  (analysed using a conventional glassy carbo electrode).

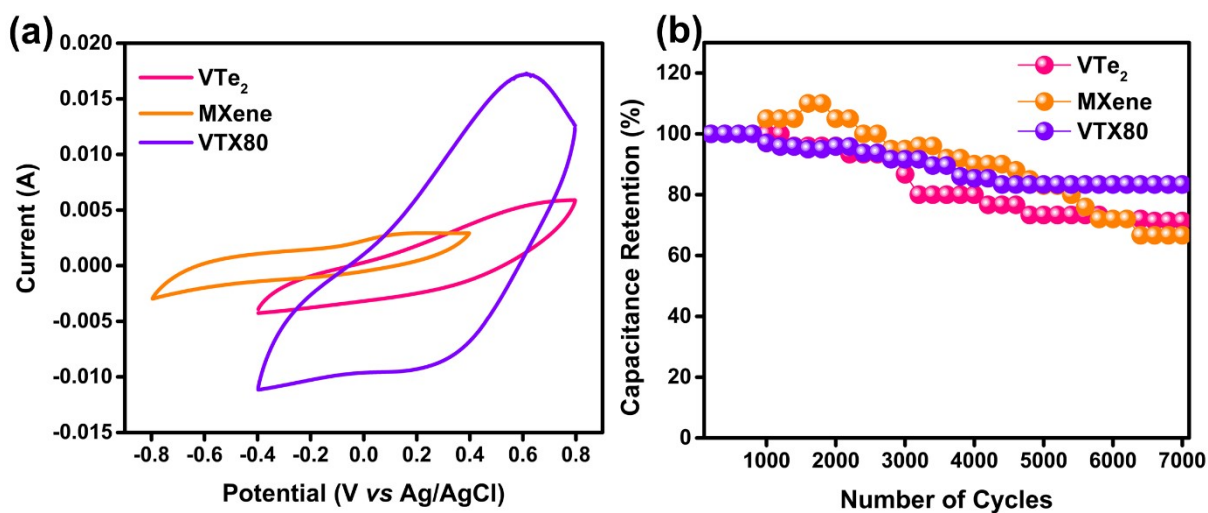

**Figure S8:** (a) Comparative CV profile of VTe<sub>2</sub>, MXene and VTX80 at 100 mV/s, (b) Cyclic stability of VTe<sub>2</sub>, MXene and VTX80. VTe<sub>2</sub> and MXene have a cyclic stability of 71.3% and 66.6% respectively, VTX80 on the other hand showed an improved cyclic stability of 83.3%.

| Scan Rate<br>(mV/s) | Capacitive Contribution<br>(%) | Diffusive Contribution<br>(%) |
|---------------------|--------------------------------|-------------------------------|
| 10                  | 81.8                           | 18.2                          |
| 20                  | 82.9                           | 17.1                          |
| 40                  | 83.6                           | 16.4                          |
| 60                  | 85.8                           | 14.2                          |
| 80                  | 89.2                           | 10.8                          |
| 100                 | 90.1                           | 9.9                           |
| 200                 | 97.2                           | 2.8                           |

**Table S1:** The segregated capacitive and diffusive contributions obtained by deconvoluting CV using Dunn method.

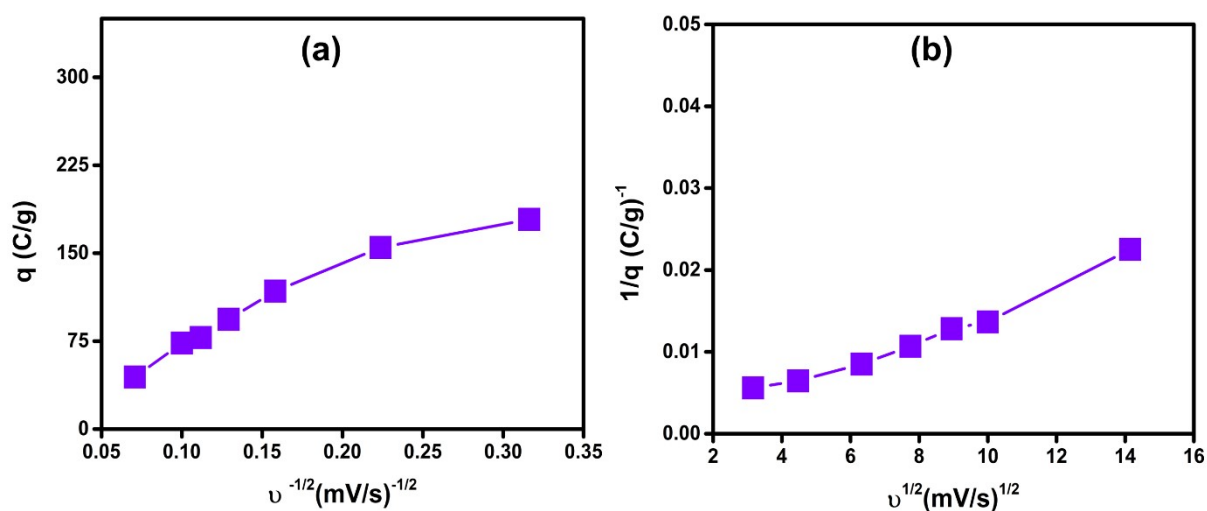

**Figure S9:** (a-b) Trasatti plots.



| Sample           | $R_s$ ( $\Omega$ ) | $R_{ct}$ ( $\Omega$ ) |
|------------------|--------------------|-----------------------|
| VTe <sub>2</sub> | 8.07               | 9.43                  |
| VTX40            | 5.5                | 18.51                 |
| VTX80            | 2.62               | 5.48                  |
| VTX120           | 5.11               | 9.44                  |

**Table S2:** The  $R_s$  and  $R_{ct}$  values of all the samples obtained from Nyquist plot.

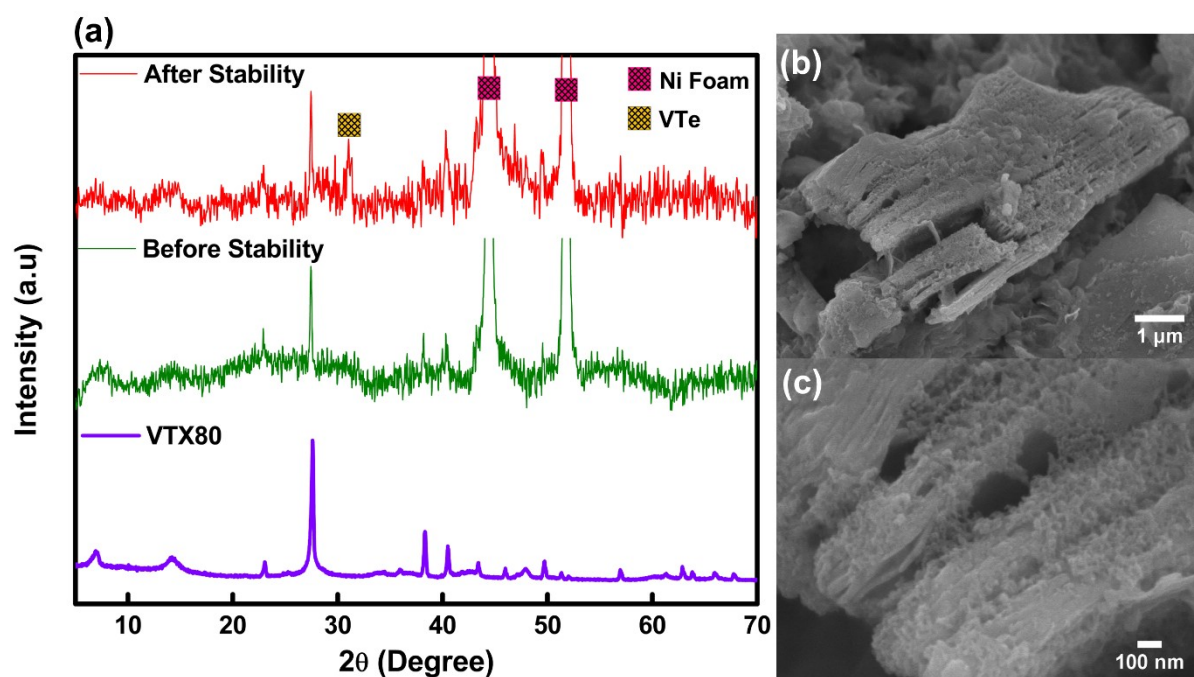

**Figure S10:** Characterization of VTX80 electrode after electrochemical analysis. (a) XRD pattern of VTX80 electrode before and after. A notable peak  $\sim 31^\circ$  which can be assigned to the (101) plane of VTe (JCPDS: 89-7104). XRD pattern of VTX80 electrode shows sharp intense doublet of Ni foam which has been used as the current collector.<sup>2</sup> (a) low and (b) high resolution FESEM images of VTX80 electrode after the electrochemical analysis. The 3D interconnected structure of VTe<sub>2</sub> and MXene is intact after the electrochemical analyses.

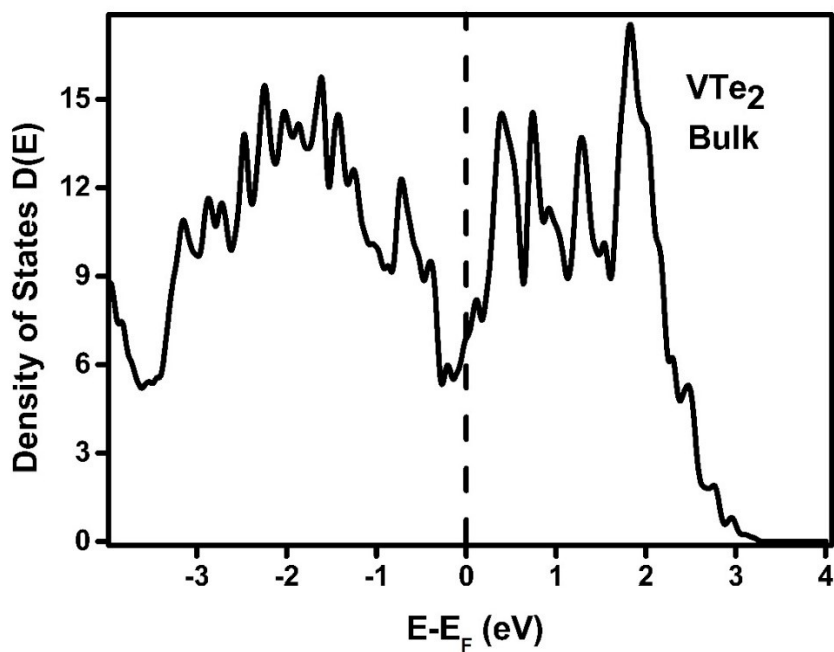

Figure S11: Plot of total density of states of VTe<sub>2</sub> bulk.

(a) VTe<sub>2</sub>/FG-MXene

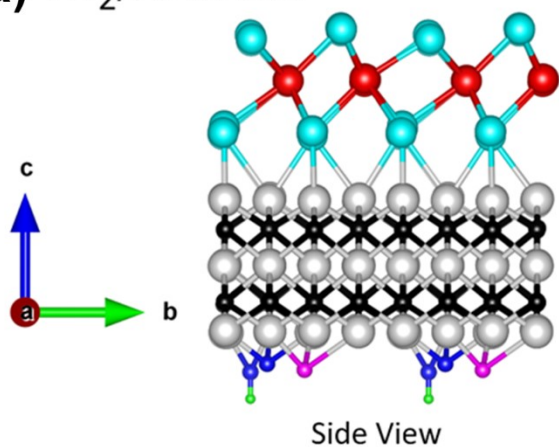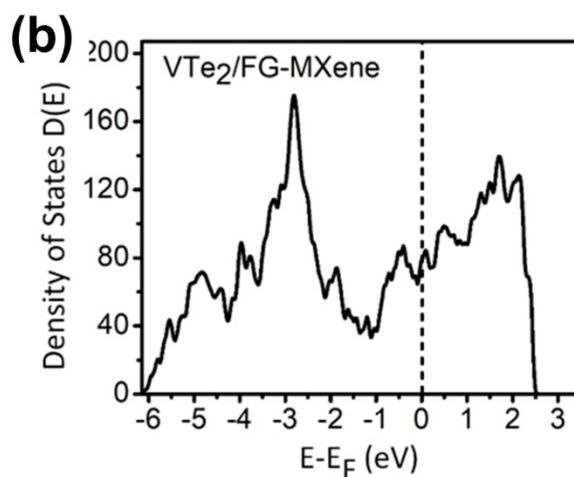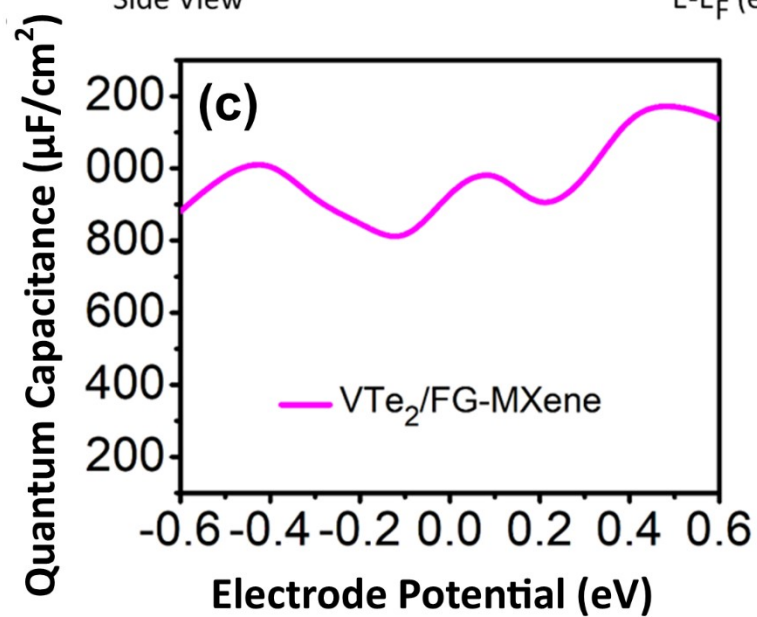

**Figure S12:** (a) Optimized structure of  $\text{VTe}_2/\text{FG-MXene}$ , (b) total DOS for the proposed model heterostructure and (c) Variation of quantum capacitance against applied electrode potential. Blue, green and pink spheres denote the oxygen, hydrogen and fluorine atoms respectively.

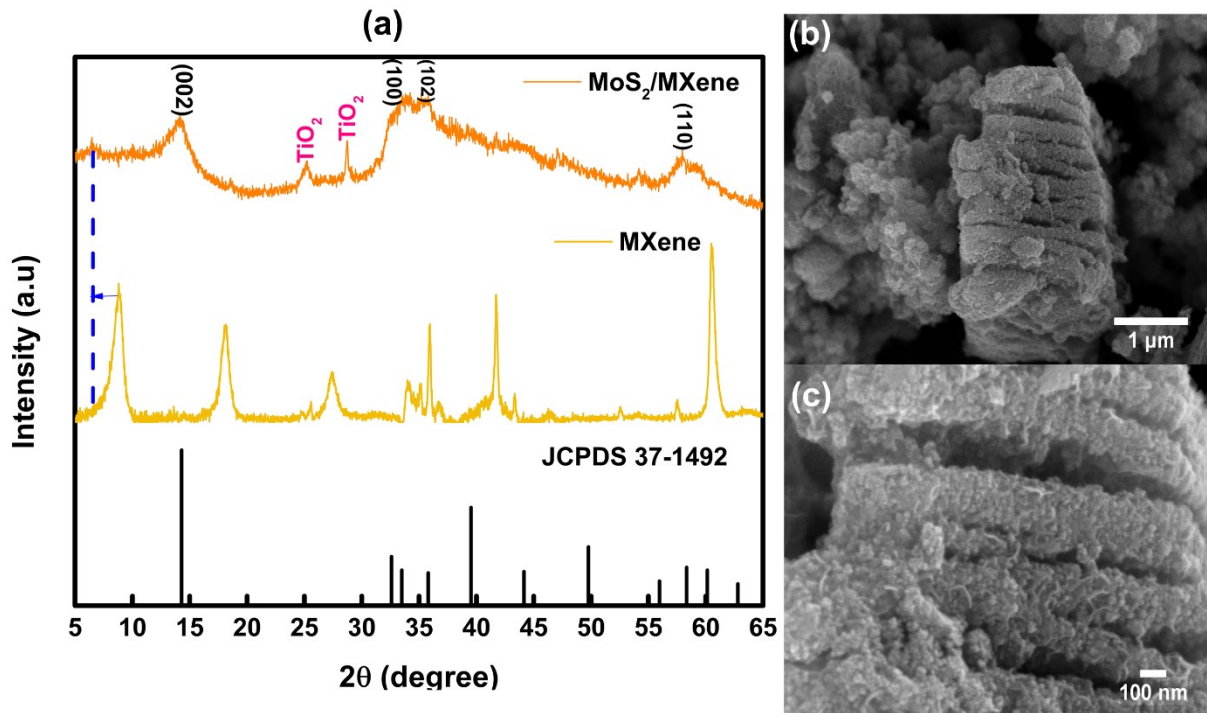

**Figure S13:** Characterization of the synthesized  $\text{MoS}_2/\text{MXene}$  heterostructure used as the negative electrode. (a) The XRD pattern of  $\text{MoS}_2/\text{MXene}$  heterostructure showed XRD reflections corresponds to the JCPDS card 37-1492 of  $\text{MoS}_2$ .<sup>3</sup> The (002) peak of  $\text{Ti}_3\text{C}_2$  MXene has shifted from  $8.8^\circ$  to  $6.4^\circ$  indicating an increment in the interlayer spacing for the heterostructure similar to  $\text{VTe}_2/\text{MXene}$  heterostructure.<sup>4</sup> The presence of  $\text{TiO}_2$  is observed in the heterostructure is due to the surface oxidation of MXene.<sup>5</sup> (b, c) FESEM images of  $\text{MoS}_2/\text{MXene}$  reveals a 3D interconnected heterostructure similar to  $\text{VTe}_2/\text{MXene}$ . It clear from the FESEM images that MXene is acting as the growth template for the growth of  $\text{MoS}_2$  nanosheets.<sup>6</sup>

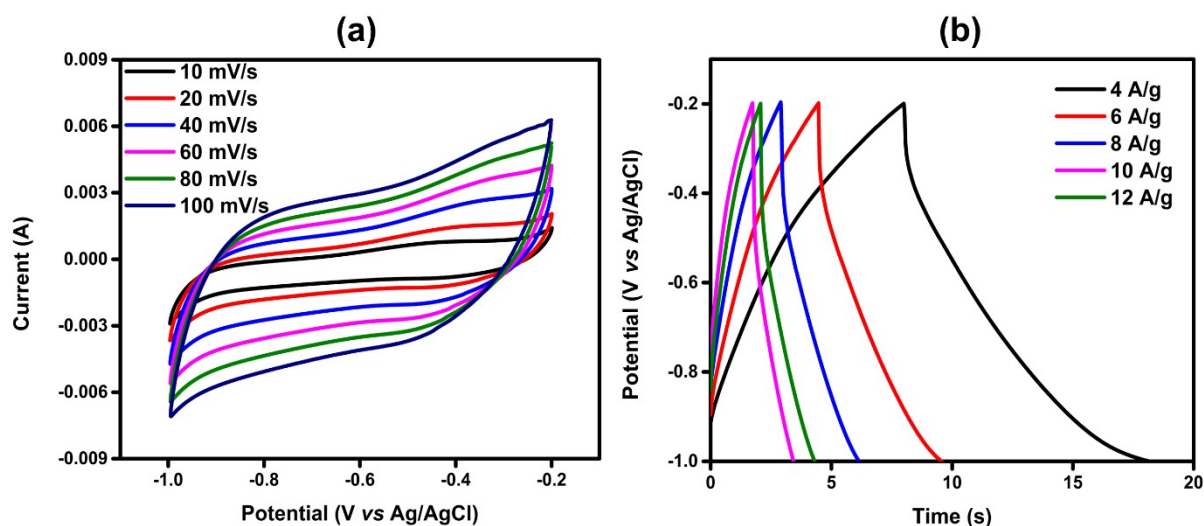

**Figure S14:** Three electrode measurements of MoS<sub>2</sub>/MXene heterostructure (a) cyclic voltammogram of MoS<sub>2</sub>/MXene performed in a potential window of -0.2 - -1.0 V in different scan rates and (b) GCD curves of MoS<sub>2</sub>/MXene in varying specific currents.

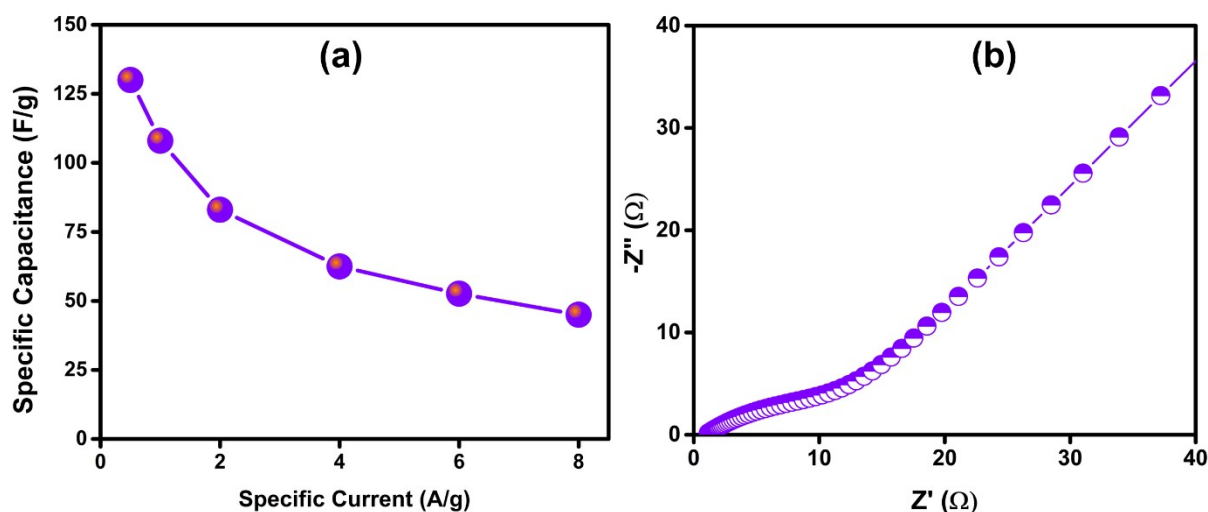

**Figure S15:** (a) Specific capacitance vs specific current plot of the ASC and (b) Nyquist plot of the ASC.

## References

- 1 Y. Shao, M. F. El-Kady, J. Sun, Y. Li, Q. Zhang, M. Zhu, H. Wang, B. Dunn and R. B. Kaner, *Chem. Rev.*, 2018, **118**, 9233–9280.
- 2 S. R. K A, S. Adhikari, S. Radhakrishnan, P. Johari and C. S. Rout, *Nanotechnology*,

- 2022, **33**, 295703.
- 3 B. Kirubasankar, M. Narayanasamy, J. Yang, M. Han, W. Zhu, Y. Su, S. Angaiah and C. Yan, *Appl. Surf. Sci.*, 2020, **534**, 147644.
  - 4 X. Wang, H. Li, H. Li, S. Lin, W. Ding, X. Zhu, Z. Sheng, H. Wang, X. Zhu and Y. Sun, *Adv. Funct. Mater.*, 2020, **30**, 1–11.
  - 5 S. Raj KA, P. Mane, S. Radhakrishnan, B. Chakraborty and C. S. Rout, *ACS Appl. Nano Mater.*, 2022, **5**, 4423–4436.
  - 6 H. Li, X. Chen, E. Zalnezhad, K. N. Hui, K. S. Hui and M. J. Ko, *J. Ind. Eng. Chem.*, 2020, **82**, 309–316.
